# Supplementary material for: The link between great earthquakes and the subduction of oceanic fracture zones
Source: Copernicus journal article supplement (doi:10.5194/se-3-447-2012), 2012-12-05
Supplement: Supplementary file 1 [file Spreadsheet1.xlsx]

## Sheet: Fracture zone intersections
Fracture zone ID	Latitude	Longitude	Name	Maximum associated magnitude within 250km	Sea-floor Age (Ma)	Convergence velocity vc (mm/a)	Subduction dip (degrees)	Lithosphere thickness (km)	Age O/S (manual) Ma filtered	Grav anomaly (manual) mG	Bathym anomaly (manual) m
1	-2.277	98.529	Untitled	8.5	57.6	31.4	14.901	98.532	6	610.2	433.2
2	3.829	93.172	Untitled	7.3	61.2	27.1	19.223	105.924	0.4	615.486	216.2
3	7.75	91.882	NinetyeastRidge	7.9	68.2	26.33	19.429	75	6.9	187.143	548
4	2.346	94.585	Untitled	9.1	54.7	28.85	17.529	99.402	7.4	119.171	18
5	2.615	94.231	Untitled	9.1	55.4	28.04	18.979	102.475	7.4	342.429	131.1
6	-7.972	104.055	Untitled	7.5	94	36.07	16.011	96.669	NaN	184.4	118
7	-7.426	102.846	Untitled	7.9	89.1	35.29	16.011	96.669	NaN	235	255.8
8	-6.792	102.075	Untitled	8.4	85.8	35.05	14.292	98.196	NaN	688.286	663.5
9	-3.092	99.202	Investigator	8.5	65.5	31.83	14.901	98.532	NaN	766.1	459.5
10	-7.215	102.483	Untitled	7.9	87.7	35.05	14.292	98.196	4.9	414.7	123.4
11	1.757	95.715	96degree	9.1	50.8	29.59	17.529	99.402	2.95	380.9	358
12	17.003	-59.192	Barracuda	8.3	84.2	16.36	57.92	75	7.5	2684.3	1491
13	13.205	-57.587	Vema	0	84.3	16.62	57.92	75	NaN	214.1	303.2
14	12.942	-57.544	Untitled	0	84.4	16.62	57.92	75	NaN	376.4	118.4
15	13.559	-57.652	Untitled	0	84.1	16.7	57.92	75	5	175.4	239.1
16	13.887	-57.712	Untitled	7.2	83.8	16.7	57.92	75	5	119.8	157
17	55.836	-152.693	Aja	8.3	49.6	29.36	13.86	95.094	NaN	330.2	234.1
18	56.249	-151.462	Untitled	8.3	48.9	26.5	13.86	95.094	NaN	313.657	161
19	14.891	-95.124	Untitled	8.4	27.1	47.65	28.959	94.053	7	933.914	830
20	-3.047	-81.642	Untitled	7.9	31.4	53.53	17.172	200.039	NaN	967.5	1283.3
21	-4.194	-81.977	Untitled	7.8	32.1	53.71	13.957	200.868	NaN	616.571	508
22	-4.499	-82.009	Untitled	7.7	31.9	53.71	13.957	200.868	NaN	1052.94	1382
23	-5.103	-82.001	Untitled	7.7	31.6	53.71	13.957	200.868	NaN	785.6	1249.7
24	-5.361	-81.992	Untitled	7.7	31.5	53.71	13.957	200.868	NaN	891.914	923.7
25	-10.087	-80.272	Mendana	8.6	42	57.8	13.936	199.194	11.5	312.514	666
26	-8.989	-80.898	Trujillo	8.6	31	56.62	16.273	197.587	10	353.1	601.1
27	-10.398	-80.091	Untitled	8.2	42.9	57.8	13.936	199.194	10	460.229	84
28	15.218	-95.694	Untitled	7.9	19.7	46.93	27.836	96	8.4	881.1	895.7
29	13.383	-92.463	Untitled	7.9	27	51.03	29.141	95	1.2	574.229	514.8
30	-17.632	-73.569	Nazca	8.8	50.9	59.51	27.01	200.057	3.9	686.429	704
31	-45.619	-75.997	Guamblin	7.1	8.3	51.48	NaN	110.087	5	1078.43	1206.1
32	-45.834	-75.995	Untitled	7.1	8.5	51.48	NaN	110.087	5.3	74.914	98
33	-46.604	-75.969	Taitao	6.2	10.4	50.64	NaN	101.028	6	625.171	416
34	-47.015	-75.993	Untitled	0	11.4	50.64	NaN	101.028	6.2	494.4	314.7
35	-48.943	-76.988	Untitled	0	11.1	49.64	NaN	97.19	NaN	276.629	101
36	-43.892	-75.723	Guafo	8.5	10.8	52.76	NaN	122.284	6.8	725.343	631.1
37	-41.767	-75.396	Untitled	8.5	22.4	59.77	17.754	125.113	8	310	196
38	-40.334	-75.192	Valdivia2	9.5	25.9	61.63	16.917	124.883	NaN	434.4	364
39	-40.024	-75.154	Valdivia	9.5	26.2	61.63	16.917	124.883	NaN	551.771	868
REMOVED	REMOVED	REMOVED	REMOVED	REMOVED	REMOVED	REMOVED	REMOVED	REMOVED	REMOVED	REMOVED	REMOVED
41	42.641	147.255	Nosappu	8.4	126.7	74.22	25.501	94.712	NaN	491.6	411.6
42	36.193	142.769	Kashima2	9	130	73.69	17.29	94.94	5	396.857	212.2
43	35.871	142.529	Kashima	9	129.5	73.69	17.29	94.94	5	291.9	213.1
44	51.336	160.426	Kamchatka	8.5	102.2	66.05	26.874	94.919	NaN	129.743	161.6
45	53.299	162.616	Krusenstern	8.4	99.2	60.67	19.006	94.965	NaN	647.143	684
46	-37.94	-74.634	Mocha	8.8	33.3	62.27	23.665	127.461	NaN	395.314	456.8
47	-61.481	-61.098	Untitled	0	44.9	6.25	NaN	96.574	NaN	436.114	222
48	-56.746	-69.786	Untitled	7.8	20.3	13.05	NaN	94.97	NaN	1616.91	1376
49	-61.324	-60.48	Untitled	0	46.6	6.18	NaN	96.574	NaN	54.9	33.9
50	23.667	126.257	Untitled	7	56.1	75.18	31.749	80	NaN	147.314	709.3
51	23.91	126.634	Untitled	7	55.7	74.54	31.749	80	NaN	316.057	500
52	-32.408	-72.789	Santiago	8.7	41.3	61.26	17.433	152.172	NaN	821.1	662
53	50.751	177.422	Rat	8.7	47.9	54.44	37.579	105	2.4	860.429	1200
54	51.023	-172.852	Amlia	8	52.4	48.53	25.78	105	8.7	542.4	628
55	50.525	-176.819	Adak	8.6	49.9	48.74	26.66	105	1.5	123.7	304
56	-59.295	-24.365	Untitled	7.7	31.6	11.19	40.977	95	7.4	1030.29	1154
57	-58.21	-23.823	Untitled	7.7	38.6	11.4	26.499	95	5.9	1242.51	908
58	-57.217	-24.215	Bullard	7.7	45.7	11.44	33.846	95	6	572.8	666
59	8.58	-82.61	Untitled	8.3	NaN	NaN	NaN	94.421	8	1245.4	1898.5
60	40.3	-124.73	Untitled	7.6	NaN	NaN	8.969	95.008	12	2025.89	1847.5
Top 25 filtered earthquakes
Fracture zone	Associated magnitude < 150km	Latitude	Longitude	Associated Fracture zone ID	Age Offset (Ma)	Grav anomaly (manual) mG	Bathym anomaly (manual) m		TopN	Recall	Number
Chile	9.5	-39.5	-74.5	38-39	NaN	551.771	868		1	1	1
Alaska	9.2	61.04	-147.73						1	0.5	2
96degree	9.1	3.295	95.982	11	2.95	380.9	358		2	0.666667	3
Kashima	9	38.322	142.37	42-43	5	396.857	212.2		3	0.75	4
Mocha	8.8	-36.122	-72.898	46	NaN	395.314	456.8		4	0.8	5
Nazca	8.8	-17.2	-71.2	30	3.9	686.429	704		5	0.833333	6
96degree	8.7	2.085	97.108	11	2.95	380.9	358		6	0.857143	7
Rat	8.7	51.29	178.55	53	2.4	860.429	1200		7	0.875	8
SAM	8.7	-8.01	-76.79	26	10	353.1	601.1		8	0.888889	9
Kashima	8.7	38	143	42-43	5	396.857	212.2		9	0.9	10
SAM	8.7	-32.5	-71.5	52	NaN	821.1	662		10	0.909091	11
Nazca	8.7	-17.2	-72.3	30	3.9	686.429	704		11	0.916667	12
Adak	8.6	51.292	-175.63	55	1.5	123.7	304		12	0.923077	13
Nazca	8.6	-15.305	-72.19	30	3.9	686.429	704		13	0.928571	14
	8.6	-13.7	-76						13	0.866667	15
SAM	8.6	-7.941	-79.038	26	10	353.1	601.1		14	0.875	16
	8.6	-11.9	-77.4						14	0.823529	17
	8.6	34	138.1						14	0.777778	18
	8.6	33	135.3						14	0.736842	19
	8.6	38.5	143.8					Close to Kashima!	14	0.7	20
	8.5	44.81	149.54						14	0.666667	21
Kamchatka	8.5	52.75	159.5	44	NaN	129.743	161.6		15	0.681818	22
	8.5	-5.25	130.5						16	0.695652	23
	8.5	-28.5	-70						16	0.666667	24
	8.5	-18.6	-71						16	0.64	25

## Sheet: Volcanic chain-ridge intersec.
Volcanic chain/seamount ID	Latitude	Longitude
1	-0.898	-80.0207
2	8.8858	-82.6145
3	16.2286	146.579
4	20.1018	145.874
5	23.4039	143.062
6	54.6841	161.811
7	-14.2731	-75.4394
8	-10.449	116.658
9	-3.9895	152.954
10	-23.2871	-175.683
11	-35.294	179.737
12	-39.5496	177.394
13	-8.5237	159.626
14	12.1701	139.642
